# Supplementary material for: Fenofibrate prevents iron induced activation of canonical Wnt/β-catenin and oxidative stress signaling in the retina
Source: PubMed Central journal article supplement (PMC7599211; doi:10.1038/s41514-020-00050-7), 2020-10-30
Supplement: 41514_2020_50_MOESM1_ESM.pdf [file 41514_2020_50_MOESM1_ESM.pdf]

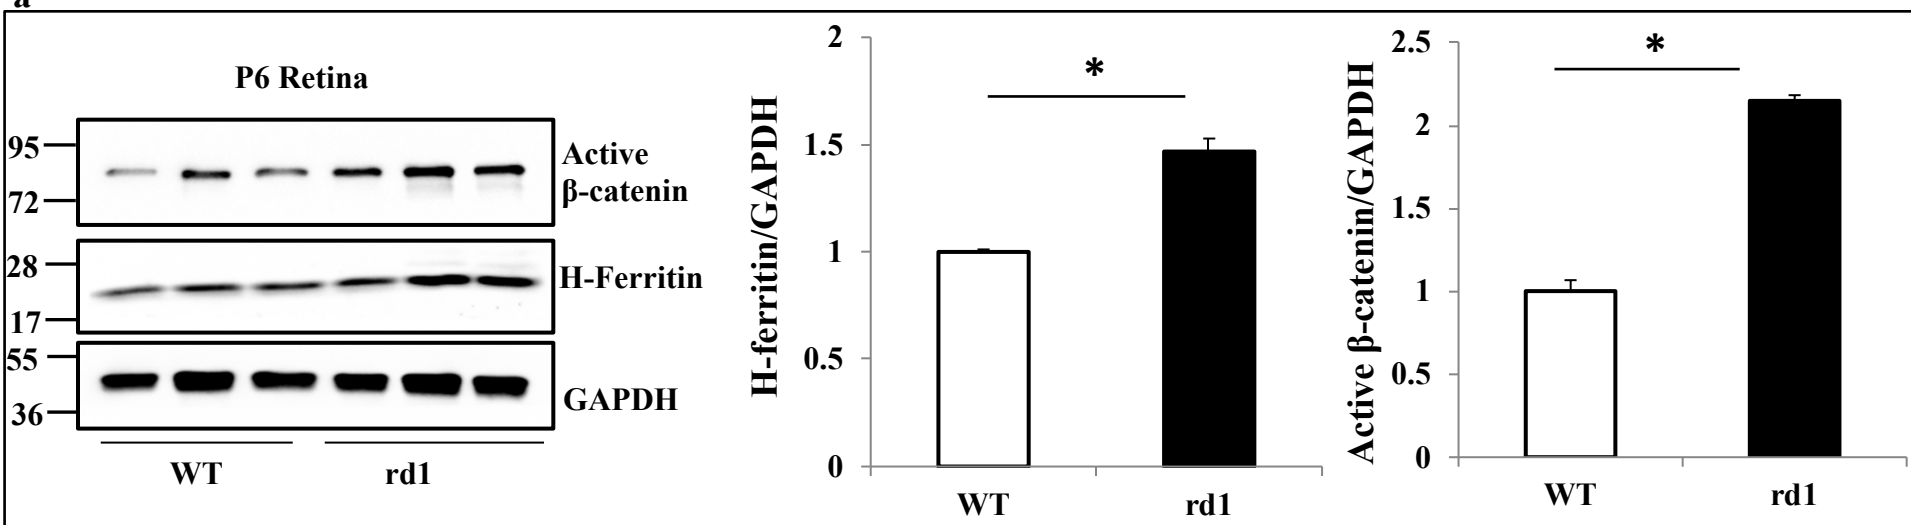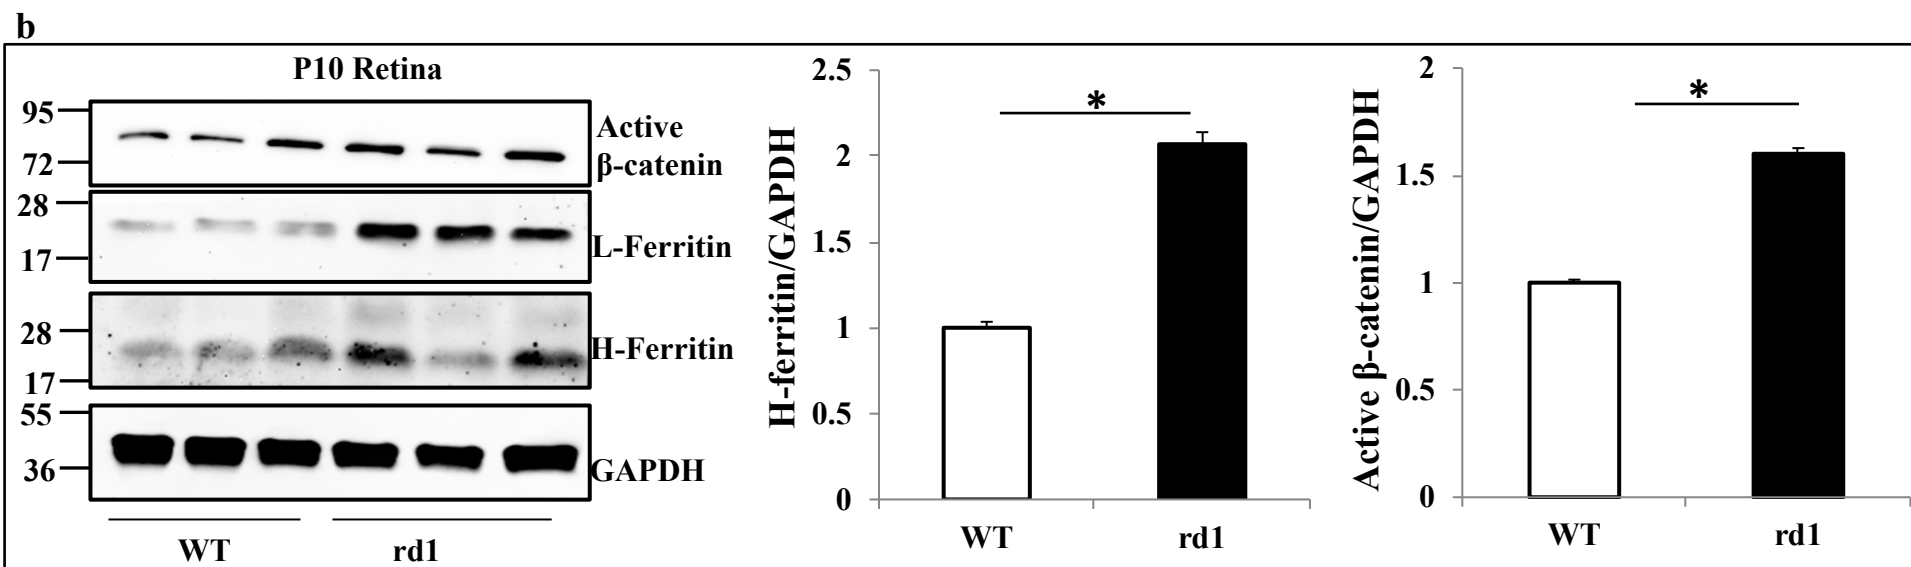

**Supplementary Figure 1**

**Supplementary Figure 1**

Heavy (H-) chain ferritin, light (L-) chain ferritin and active  $\beta$ -catenin protein levels were determined by immunoblotting in WT and rd1 mice at postnatal day 6 (a) and postnatal day 10 (b). Blots cropped from different parts of the same gel or from different gels are separated by white space in (a) and (b). Data presented as mean  $\pm$  SE of three independent experiments; n=3 mice per group; \*p < 0.05

in (a) and (b). Data presented as mean  $\pm$  SE of three independent experiments; n=3 mice per group; \*p < 0.05

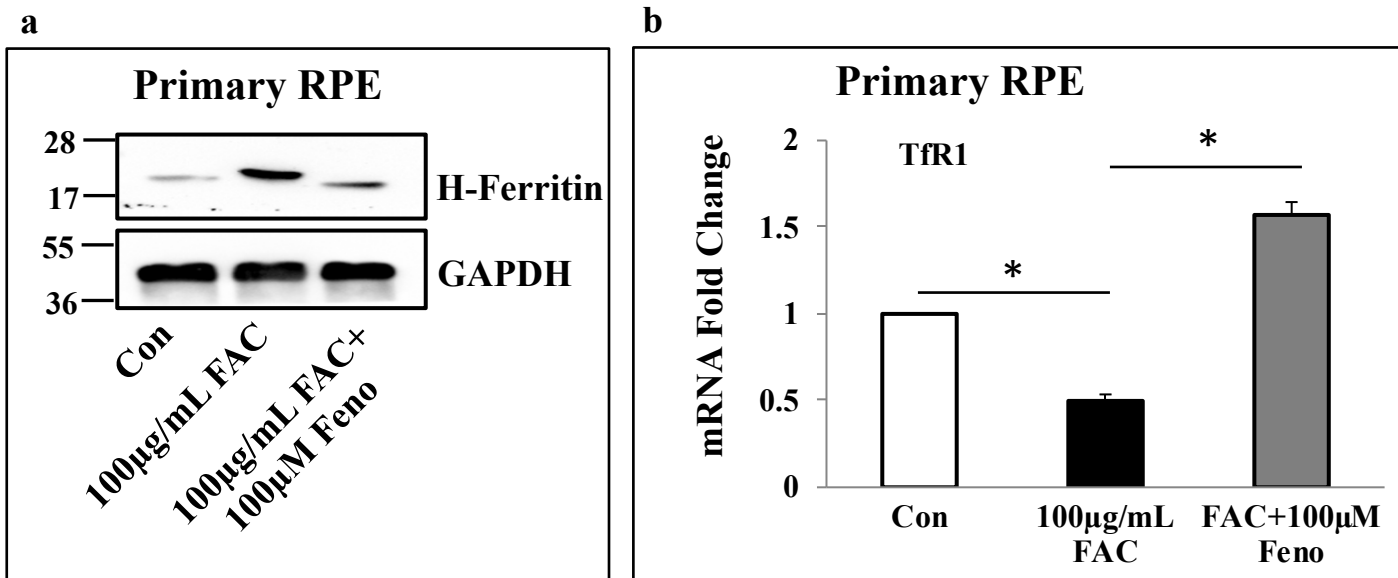

**Supplementary Figure 2**

**Supplementary Figure 2**

(a) Ferritin protein levels in mouse primary RPE cells treated with FAC and fenofibrate by western blot (b) mRNA expression of TfR1 was determined by Real-time PCR. Blots cropped from different parts of the same gel or from different gels are separated by white space in (a). Data presented as mean  $\pm$  SE of three independent experiments; \* $p < 0.05$

| <b>Name of the compound</b> | <b>% inhibition of the Ferrozine-Fe<sup>2+</sup><br/>(λ<sub>max</sub> 560)</b> |
|-----------------------------|--------------------------------------------------------------------------------|
| 100μM Fenofibrate           | 38.73684 ± 4.8                                                                 |
| 100μM Fenofibric acid       | 26.5501 ± 5.3                                                                  |
| 100μM Deferiprone           | 61.2561 ± 3.9                                                                  |

### **Supplementary Figure 3**

#### **Supplementary Figure 3**

Percentage inhibition of the ferrozine-Fe<sup>2+</sup> complex by 100 μM fenofibrate or 100 μM fenofibric acid when treated along with FeCl<sub>2</sub>. 100μM iron chelator deferiprone was used as a positive control. Data presented as mean ± SE of three independent experiments.

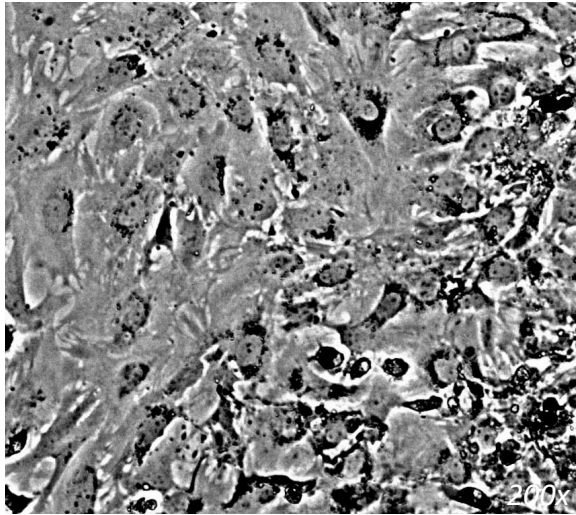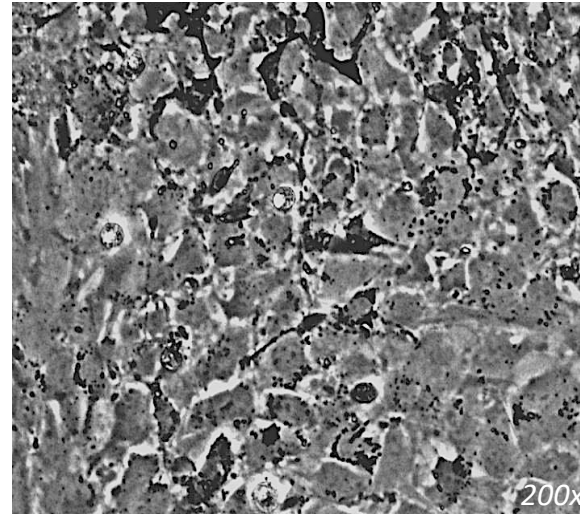

**Supplementary Figure 4**

**Supplementary Figure 4**

Representative phase-contrast images of the primary retinal pigment epithelial cells isolated from C57BL/6 mice after 6 days in culture.



### Supplementary Table 1: List of primers used

|             |                             |
|-------------|-----------------------------|
| h_Axin2_f   | 5'-CCACACCCTTCTCCAATCCA-3'  |
| h_Axin2_r   | 5'-TGGACACCTGCCAGTTTCTTT-3' |
| h_ccnd1_f   | 5'-TGAGGGACGCTTTGTCTGTC-3'  |
| h_ccnd1_r   | 5'-GCCTTTGGCCTCTCGATACA-3'  |
| h_cMYC_f    | 5'-CCCTCCACTCGGAAGGACTA-3'  |
| h_cMYC_r    | 5'-GCTGGTGCATTTTCGGTTGT-3'  |
| h_TfR1_f    | 5'-GAGGACGCGCTAGTGTCTT-3'   |
| h_TfR1_r    | 5'-TGTGACATTGGCCTTTGTGTT-3' |
| h_HO1_f     | 5'-AGACACCCTAATGTGGCAGC-3'  |
| h_HO1_r     | 5'-ATGGCCGTGTCAACAAGGAT-3'  |
| m_Axin2_f   | 5'-GCTGCGCTTTGATAAGGTCC-3'  |
| m_Axin2_r   | 5'-CGCGAACGGCTGCTTATTTT-3'  |
| m_cMYC_f    | 5'-CGTTGGAAACCCCGCAGA-3'    |
| m_cMYC_r    | 5'-TACGGAGTCGTAGTCGAGGT-3'  |
| m_ccnd1_f   | 5'-TCAAGTGTGACCCGACTG-3'    |
| m_ccnd1_r   | 5'-CCTTGGGGTTCGACGTTCTG-3'  |
| h_18srRNA_f | 5'-GTAACCCGTTGAACCCCAT-3'   |
| h_18srRNA_r | 5'-CCATCCAATCGGTAGTAGCG-3'  |

**Supplementary Table 2: List of antibodies used**

| <b>Name</b>                                                               | <b>Source</b>        | <b>Cat no.</b> | <b>Dilution</b> |
|---------------------------------------------------------------------------|----------------------|----------------|-----------------|
| Non-phospho (Active) $\beta$ -Catenin (Ser33/37/Thr41) (D13A1) Rabbit mAb | CST                  | 8814           | 1:1500          |
| $\beta$ -Catenin Antibody                                                 | CST                  | 9562           | 1:1000          |
| GSK-3 $\beta$ (27C10) Rabbit mAb                                          | CST                  | 9315           | 1:1000          |
| Phospho-GSK-3-beta (Ser9) (D3A4) Rabbit mAb                               | CST                  | 9322           | 1:1000          |
| LRP6 (C47E12) Rabbit mAb                                                  | CST                  | 3395           | 1:1000          |
| c-Myc (D84C12) Rabbit mAb                                                 | CST                  | 5605           | 1:1000          |
| GAPDH (14C10) Rabbit mAb                                                  | CST                  | 2118           | 1:5000          |
| $\alpha$ -Tubulin Antibody                                                | CST                  | 2144           | 1:5000          |
| $\beta$ -Actin (8H10D10) Mouse mAb                                        | CST                  | 3700           | 1:5000          |
| Anti-Ferritin Heavy Chain antibody                                        | Abcam                | ab65080        | 1:1000          |
| Anti-Ferritin Light Chain antibody                                        | Abcam                | ab69090        | 1:1000          |
| Anti-Transferrin Receptor antibody                                        | Abcam                | ab84036        | 1:1000          |
| HDAC1 Antibody (10E2)                                                     | SCBT                 | sc-81598       | 1:1000          |
| Shc Antibody (PG-797)                                                     | SCBT                 | sc-967         | 1:1000          |
| Angiotensin II/III Antibody                                               | Novus<br>Biologicals | NB100-62346    | 1:1000          |
| Renin Antibody                                                            | Novus<br>Biologicals | AF4277         | 1:1000          |

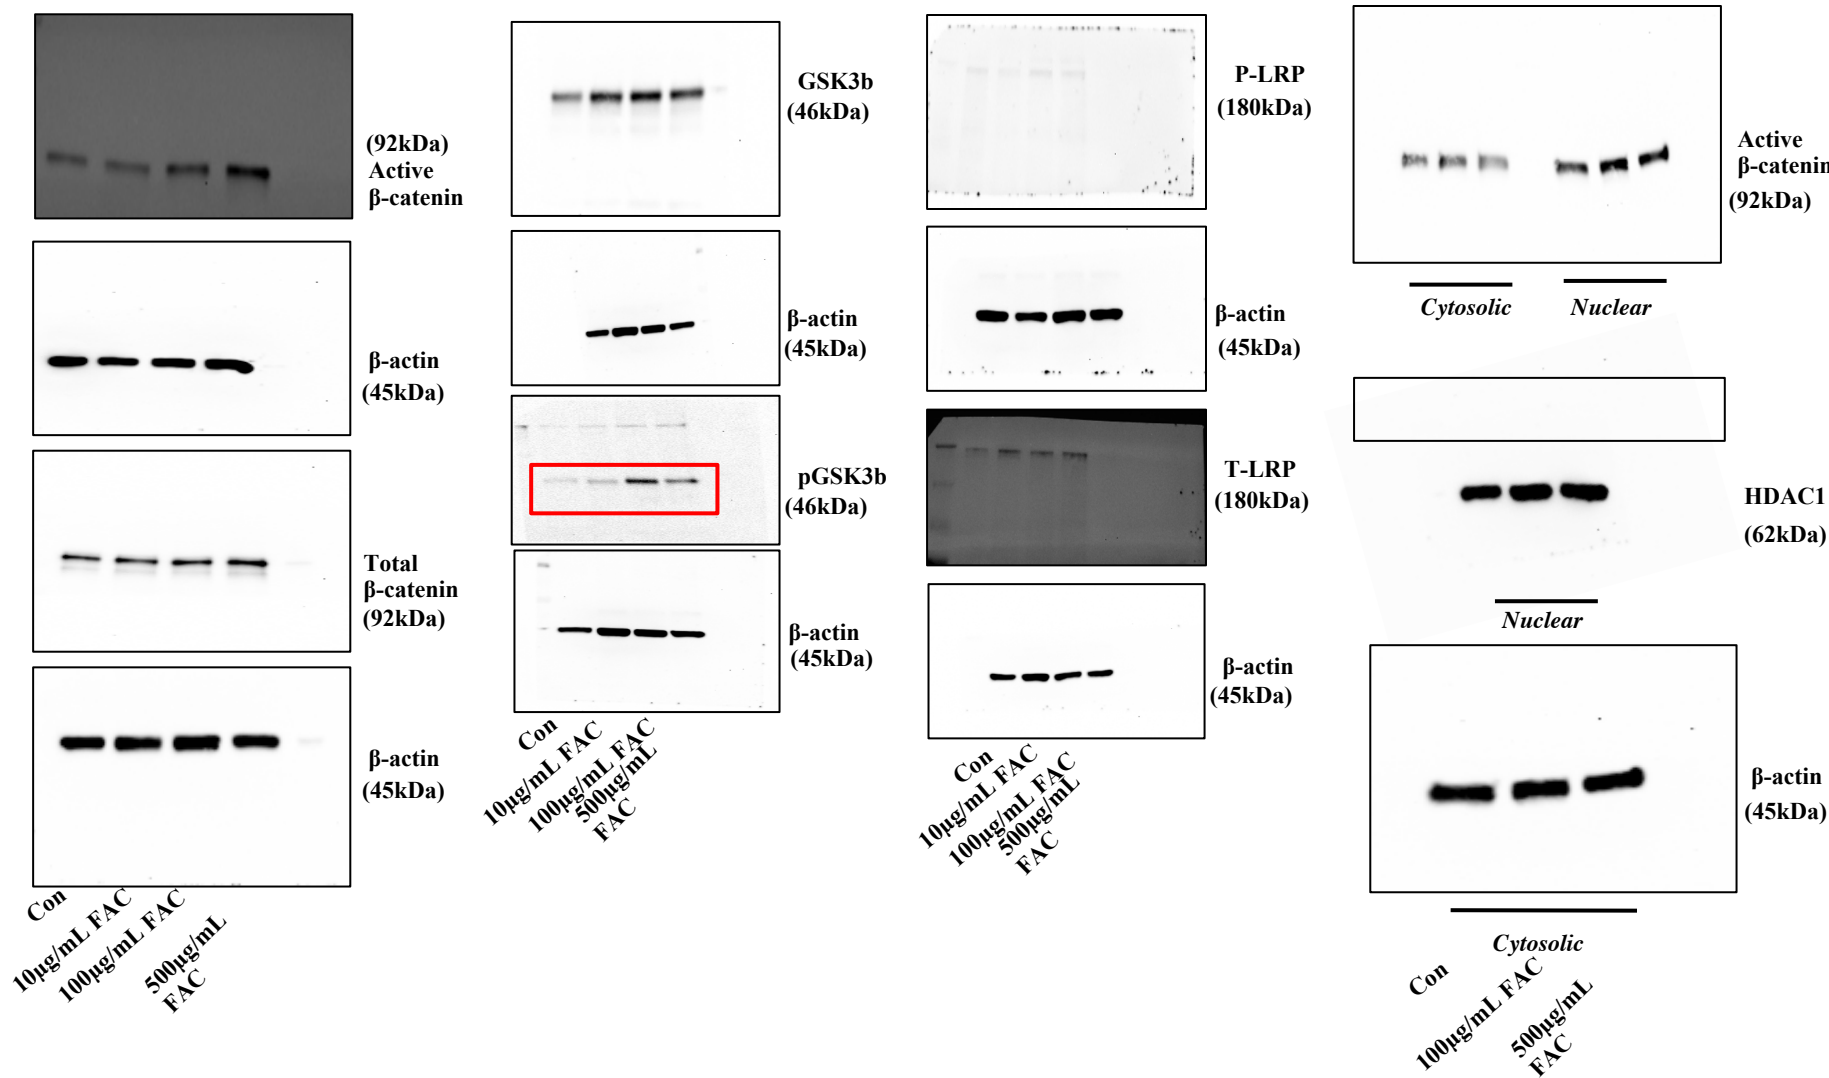

**Figure 1.** Uncropped Western blots

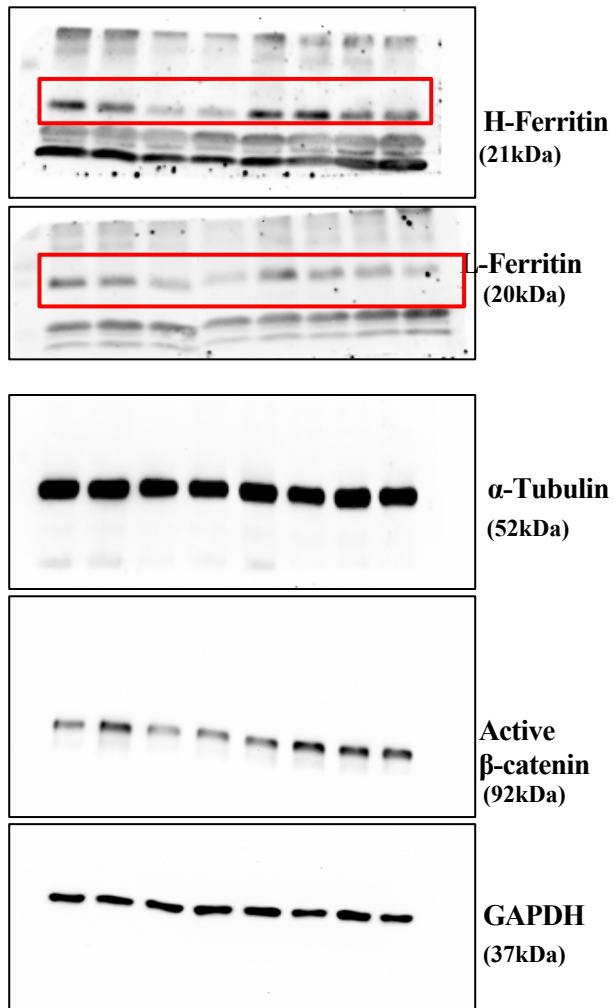

**Figure 2B-C**  
Uncropped Western blots

Apo-Tfn                      Holo-Tfn

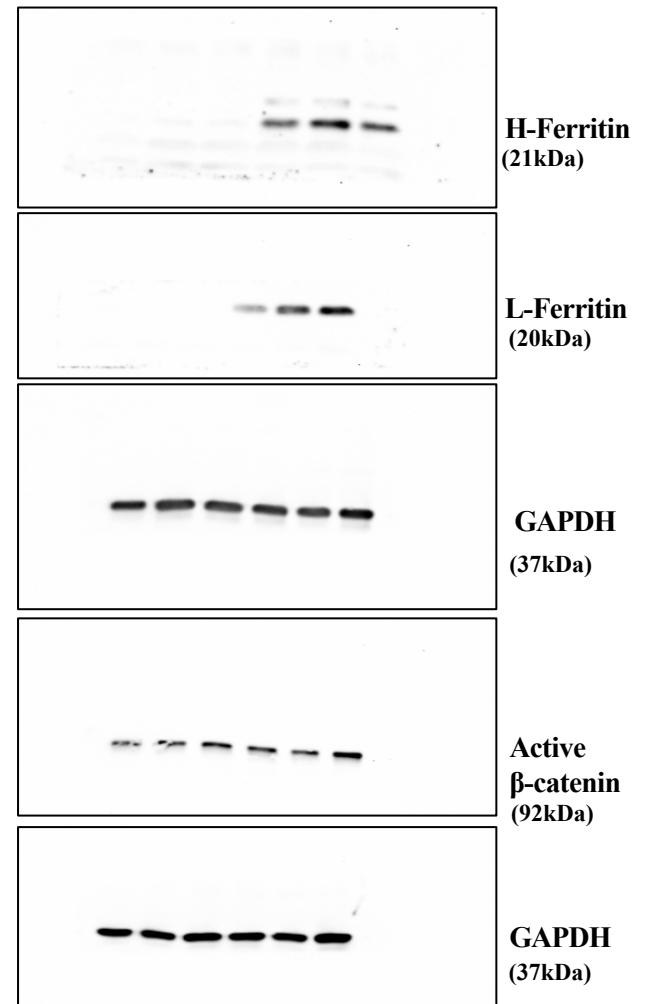

**Figure 2D-E**  
Uncropped Western blots

PBS                      Iron dextran

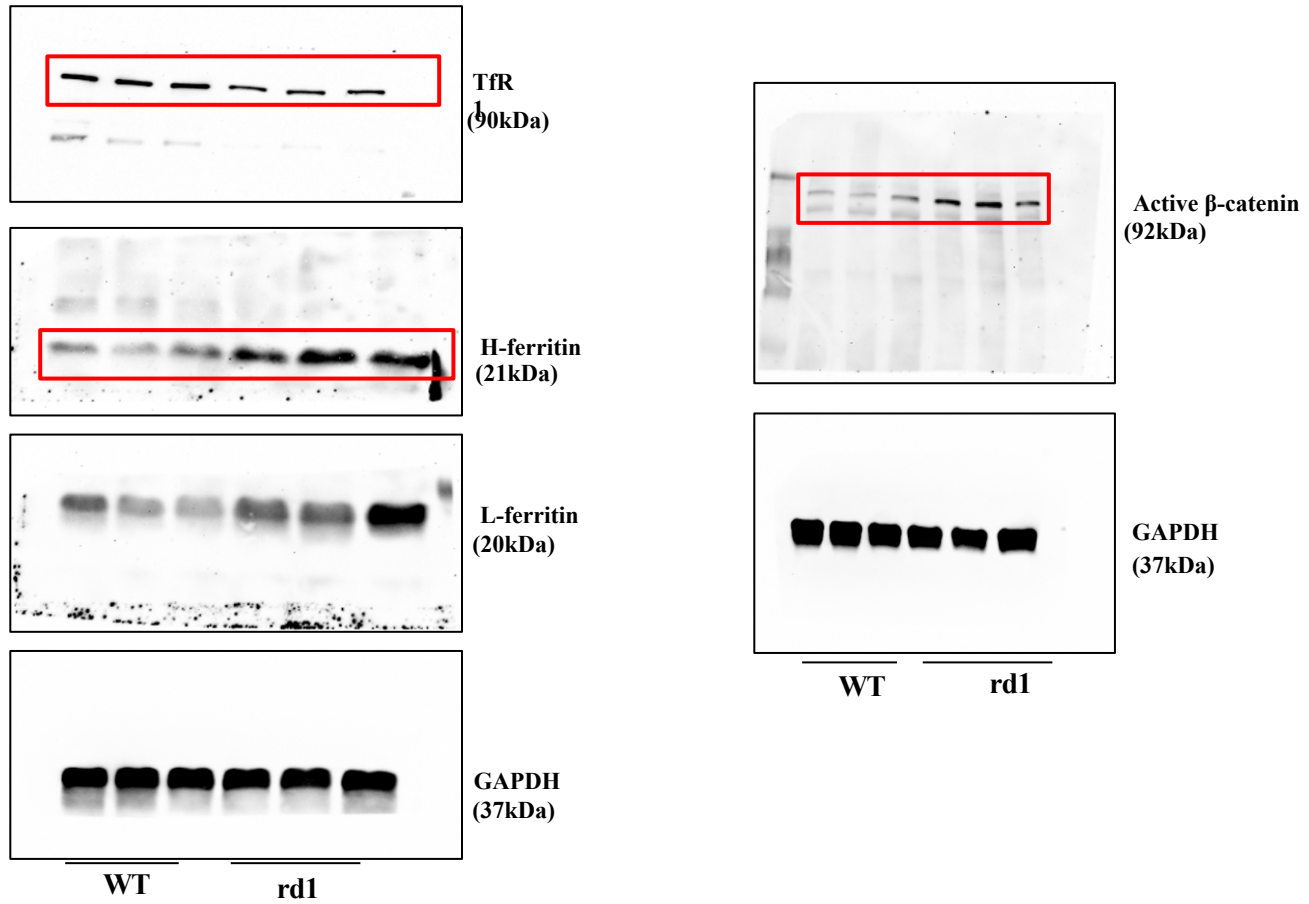

**Figure 3.** Uncropped Western blots

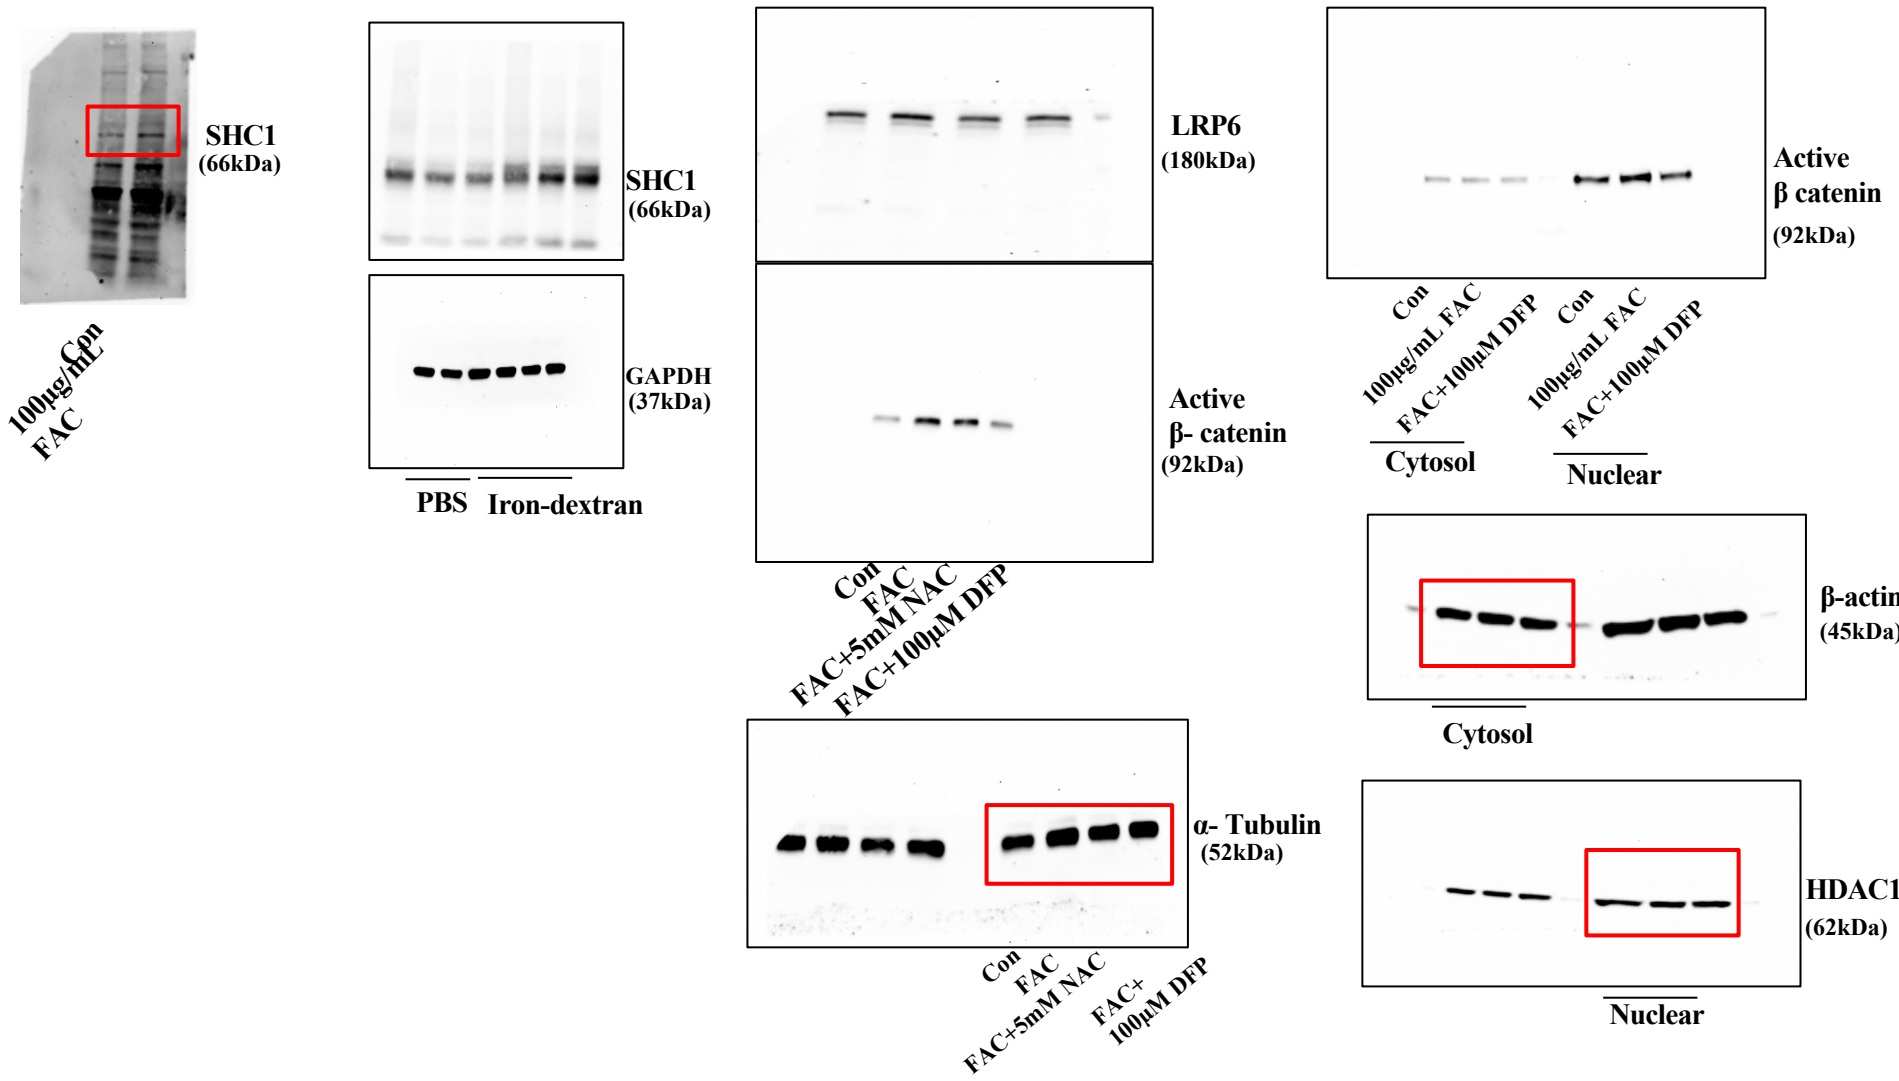

Figure 4. Uncropped Western blots

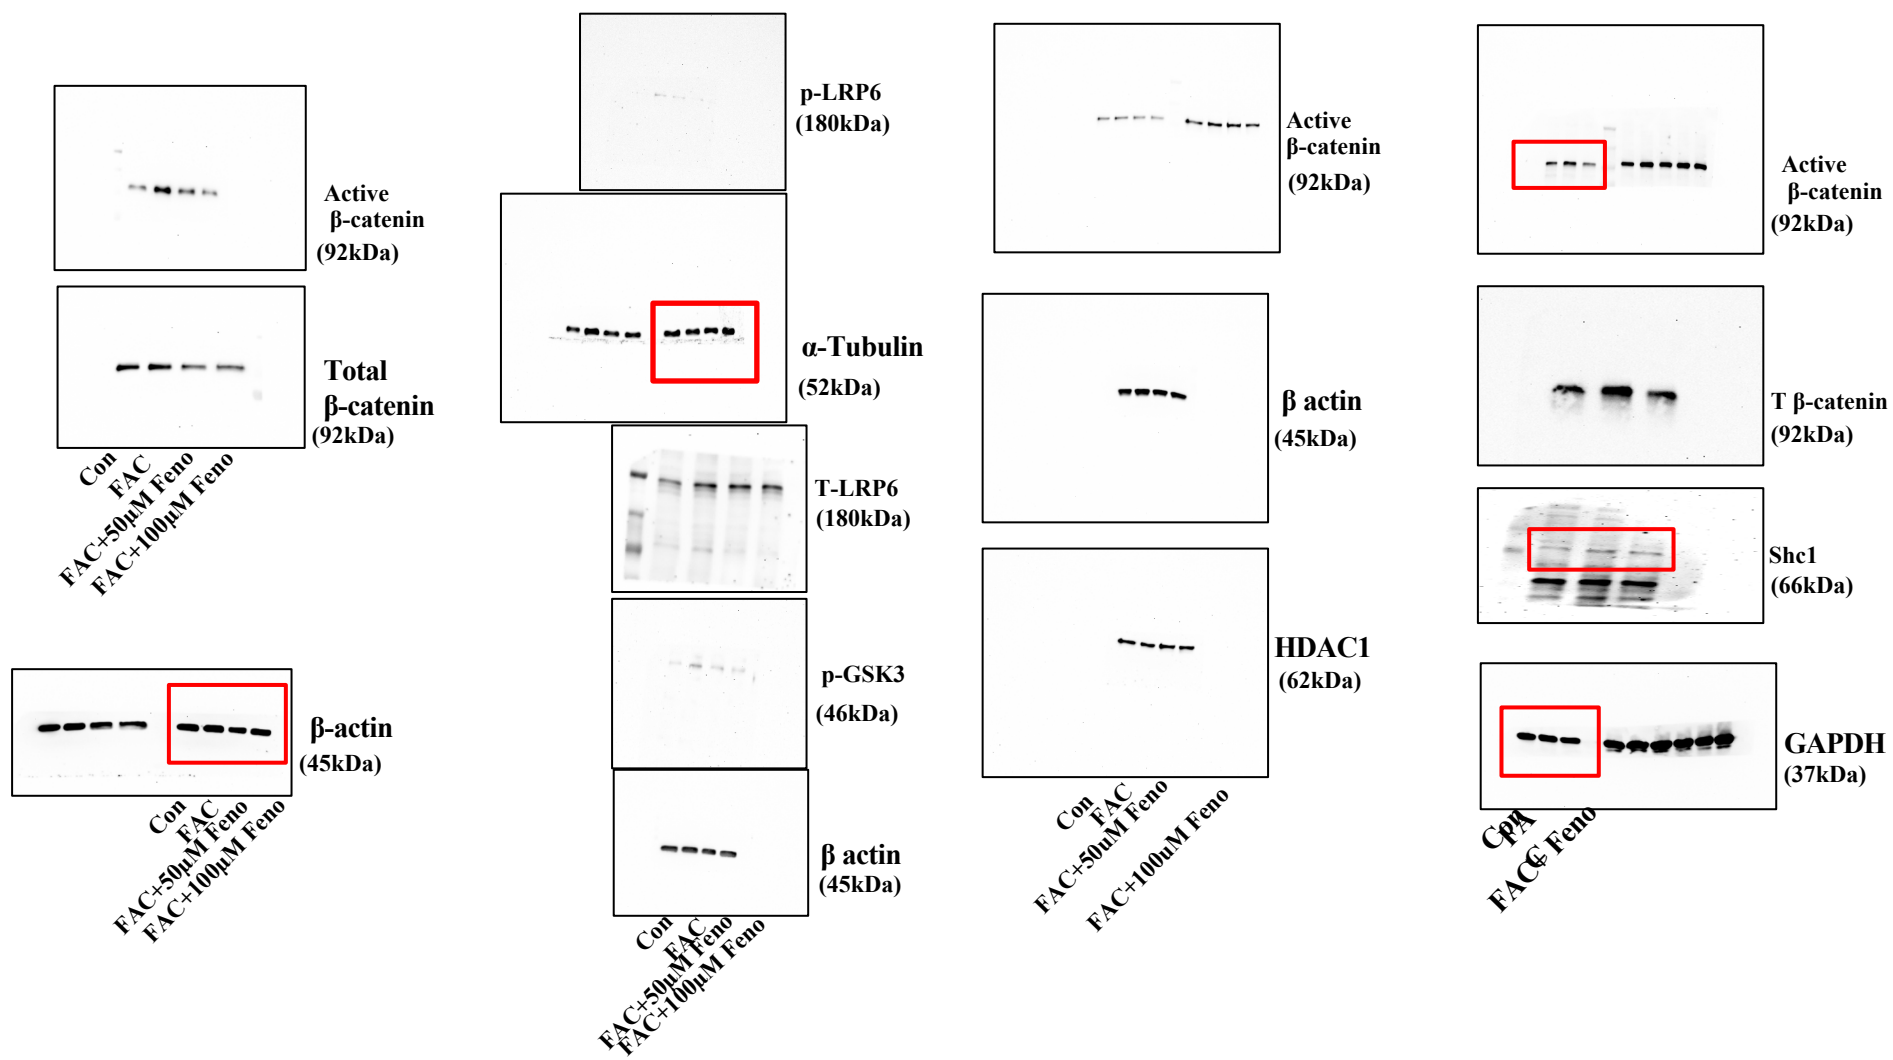

Figure 5. Uncropped Western blots

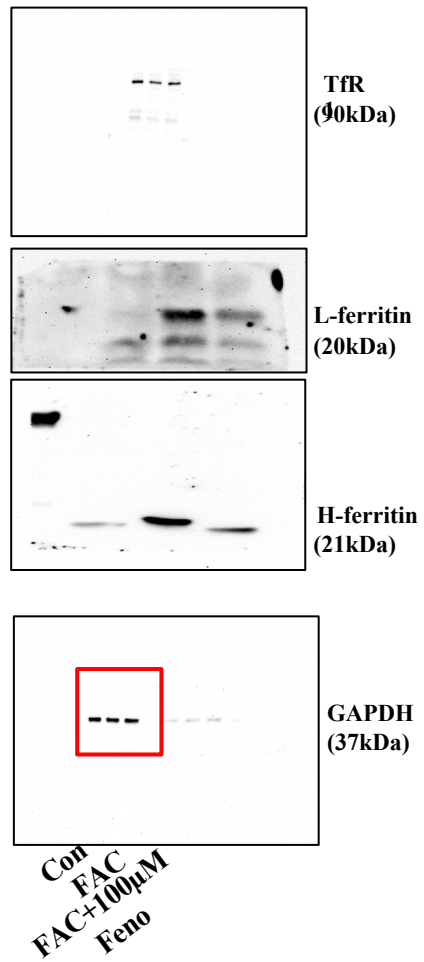

**Figure 6.** Uncropped Western blots

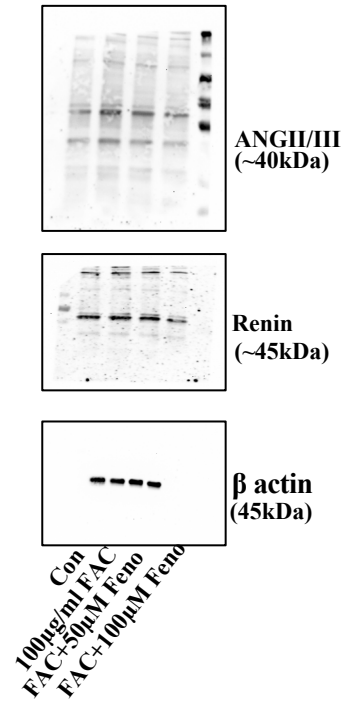

**Figure 7.** Uncropped Western blots
